# Supplementary material for: The transcription factor MYB40 is a central regulator in arsenic resistance in Arabidopsis
Source: PubMed Central journal article supplement — Plant Commun. 2021 Aug 19;2(6):100234. doi: 10.1016/j.xplc.2021.100234 (PMC8577101; doi:10.1016/j.xplc.2021.100234), 2021-08-19
Supplement: mmc1.pdf [file mmc1.pdf]

**Plant Communications, Volume 2**

**Supplemental information**

**The transcription factor MYB40 is a central regulator in arsenic resistance in *Arabidopsis***

**Yun Chen, Hong-Yang Wang, and Yi-Fang Chen**

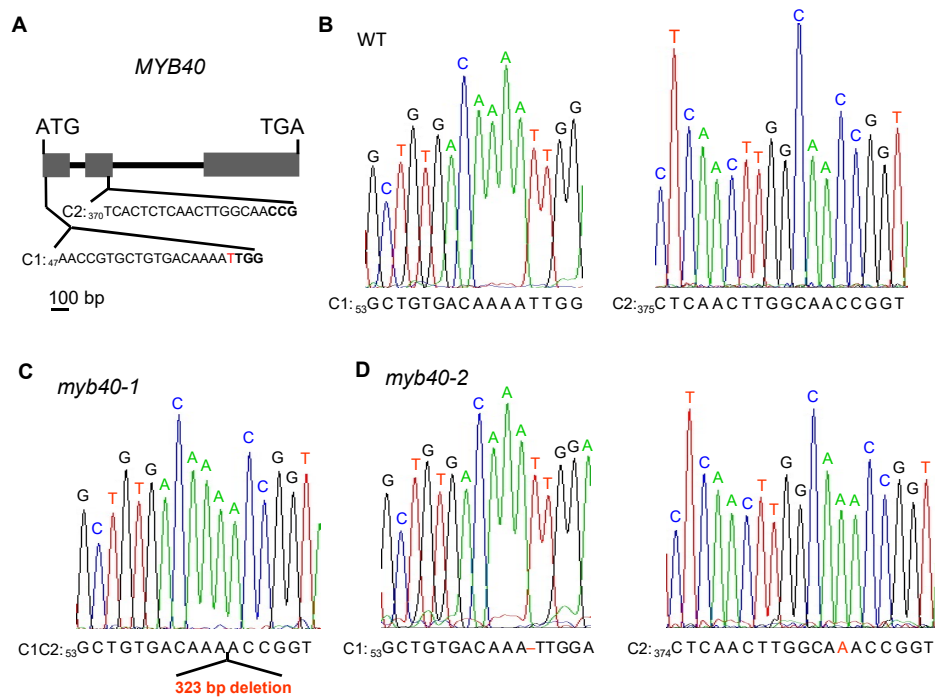

**Supplemental Figure 1. The *myb40* Mutant was Generated by CRISPR/Cas9 Technology**  
**(A)** Diagram of *MYB40* showing two target sites (C1 and C2) for CRISPR/Cas9 technology. PAM motifs are marked with bold letters. The exons and introns of *MYB40* are indicated by gray boxes and black lines, respectively.  
**(B and D)** Mutation in the *MYB40* gene was evaluated by sequencing. The mutant sites in *MYB40* are indicated by red letters.

**Supplemental Table 1.** Primer sequences used in this study.

| Primer Name                       | Primer Sequence (5'-3')                     | Vector Design   |
|-----------------------------------|---------------------------------------------|-----------------|
| <b>For Cloning and Genotyping</b> |                                             |                 |
| MYB40-F                           | ATGGGGAGAAAACCGTGCTGTG                      | pCXS            |
| MYB40-R                           | TCATAAGAGGAAAAGATTATCAT                     |                 |
| MYB40-F                           | TCTAGAATGGGGAGAAAACCGTGCTGTG                | pCAMBIA1300:GFP |
| MYB40-R                           | GGTACCTAAGAGGAAAAGATTATCAT                  |                 |
| MYB40-F                           | TCTAGAATGGGGAGAAAACCGTGCTGTG                | pCAMBIA1300-Myc |
| MYB40-R                           | GGTACCTAAGAGGAAAAGATTATCAT                  |                 |
| MYB40-DT1BSF                      | ATATATGGTCTCGATTGAACCGTGCTGTGACAAAATGTT     | pHEE2A-TRI      |
| MYB40-DT1F0                       | TGAACCGTGCTGTGACAAAATGTTTTAGAGCTAGAAATAGC   |                 |
| MYB40-DT2R0                       | AACGTTGCCAAGTTGAGAGTGACAATCTCTTAGTCGACTCTAC |                 |
| MYB40DT2-BSR                      | ATTATTGGTCTCGAAACGTTGCCAAGTTGAGAGTGAC       |                 |
| <b>For qRT-PCR</b>                |                                             |                 |
| Actin2/8-F                        | ACGGTAACATTGTGCTCAGTGGTG                    |                 |
| Actin2/8-R                        | CTTGAGATCCACATCTGCTGGA                      |                 |
| MYB40-F                           | GGCTACGCACAAACCGATGA                        |                 |
| MYB40-R                           | TTTCGCCACAAGTTCCTCATCAT                     |                 |
| PHT1;1-F                          | CCTTTGGGTTCCCTATATGCG                       |                 |
| PHT1;1-R                          | TAACCTCAGCCTCACCAGAG                        |                 |
| PCS1-F                            | GGAAGCCATGGACAGTATTG                        |                 |
| PCS1-R                            | TTCTCCTCTGCGCTGAGATT                        |                 |
| ABCC1-F                           | CCGCAGAAATCCTCTTGGTCTTGATG                  |                 |
| ABCC1-R                           | GTGAATCATCACCGTTAGCTTCTCTGG                 |                 |
| ABCC2-F                           | AATGGCTGGCTTCTTCTCGC                        |                 |
| ABCC2-R                           | TCGGTTCCTTGCCAATCTGC                        |                 |
| ATQ1/HAC1-F                       | CTCAAGTGGCATCGGTTTGC                        |                 |
| ATQ1/HAC1-R                       | CGAATCCAGCGTCAACCCAA                        |                 |
| <b>For EMSA and ChIP</b>          |                                             |                 |
| Actin-F                           | CCGGTATTGTGCTCGATTCTG                       |                 |
| Actin-R                           | TTCCCGTTCTGCGGTAGTGG                        |                 |
| PHT1;1 P2-F                       | GTATAAGGTGTTTCATATTCTGG                     |                 |
| PHT1;1 P2-R                       | TGAAAAGGAAAGATATGTAAGC                      |                 |

Continued

| Primer Name                                     | Primer Sequence (5'-3')      | Vector Design |
|-------------------------------------------------|------------------------------|---------------|
| <b>For EMSA and ChIP</b>                        |                              |               |
| PHT1;1 P3-F                                     | GTGTACAACGTCTAAATTAGC        |               |
| PHT1;1 P3-R                                     | GATACGCCTTCCAGAATATG         |               |
| PHT1;1 P4-F                                     | GATTTACACGAAACAATAAATAAAT    |               |
| PHT1;1 P4-R                                     | TAAATAGAAGTAGCTAATTTAGACG    |               |
| PHT1;1 P5-F                                     | ATCCTATGTTTTTCGAATATGC       |               |
| PHT1;1 P5-R                                     | GCTCTAATCATTTATTTATTGTTTC    |               |
| PHT1;1 P6-F                                     | ACAACAAAACATTCAAACCA         |               |
| PHT1;1 P6-R                                     | ATTTAAAAAAGCATATTCGAAAAA     |               |
| PHT1;1 P7-F                                     | ACTTTATTTTTGCGATGCG          |               |
| PHT1;1 P7-R                                     | ACGTTAATGTTTTAAATGGTTTG      |               |
| PCS1 P1-F                                       | CCTAAAATTTTCGTAATAATGGTC     |               |
| PCS1 P1-R                                       | TATACAGACTCACTCAATTATTTG     |               |
| PCS1 P2-F                                       | AAATCCGAACTTCCAATAAATA       |               |
| PCS1 P2-R                                       | GTTGTAGAATTTTATGAACTAGTAG    |               |
| PCS1 P3-F                                       | TTTGCTTCTCCTTTTTCAAC         |               |
| PCS1 P3-R                                       | TATTGGAAGTTTCGGATTTTT        |               |
| PCS1 P4-F                                       | AAGATTATGTACTIONTTGAGGATG    |               |
| PCS1 P4-R                                       | GAGAGTTGAAAAAGGAGAAG         |               |
| <b>For Protein Expression in <i>E.coli</i>.</b> |                              |               |
| MYB40-F                                         | GAATTCATGGGGAGAAAACCGTGCTGTG | pET-28a-SUMO  |
| MYB40-R                                         | GAGCTCTAAGAGGAAAAGATTATCAT   |               |
